# Supplementary material for: A photoprogrammable electronic nose with switchable selectivity for VOCs using MOF films
Source: Royal Society of Chemistry journal article supplement (doi:10.1039/d1sc05249g), 2021-01-01
Supplement: d1sc05249g2.zip [file d1sc05249g2.zip]

## Sheet: Sheet1
Time	c1	c2	c3	c4
Time	0%cis(S1)	0%cis(S2)	0%cis(S3)	0%cis(S4)
7057.2	-88.1425	-87.8448	-87.9368	-87.9512
7058.7	-88.226	-87.9169	-87.8475	-87.9046
7060.12	-88.229	-87.8774	-87.8342	-87.8861
7061.43	-88.2111	-87.9068	-87.8676	-87.9023
7062.83	-88.1925	-87.9461	-87.88	-87.9001
7064.23	-88.1552	-87.9128	-87.9083	-87.9169
7065.54	-88.1688	-87.9132	-87.9336	-87.8881
7066.97	-88.1686	-87.9436	-87.9274	-87.8089
7068.52	-88.1881	-88.0609	-87.915	-87.8062
7069.95	-88.277	-87.9532	-87.9041	-87.8232
7071.49	-88.1993	-87.9032	-87.8963	-87.7717
7072.93	-88.1686	-87.8801	-87.8912	-87.8083
7074.36	-88.2729	-87.8912	-87.8881	-87.8347
7075.9	-88.177	-87.8863	-87.862	-87.8519
7077.32	-88.1473	-87.9005	-87.7638	-87.8856
7078.61	-88.1417	-87.894	-87.7693	-88.0075
7080.17	-88.1666	-87.8189	-87.7993	-88.0516
7081.59	-88.1698	-87.9192	-87.8279	-87.9497
7082.99	-88.236	-87.9297	-87.8491	-87.9061
7084.38	-88.2322	-87.9368	-87.7902	-87.9111
7085.77	-88.2349	-87.8543	-87.896	-87.8577
7087.2	-88.2155	-87.8571	-87.9437	-87.9416
7088.6	-88.2415	-87.9673	-87.9407	-87.8772
7090.01	-88.2263	-88.0117	-88.0713	-87.8611
7091.57	-88.2276	-87.9198	-87.9843	-87.9304
7092.99	-88.2096	-87.9907	-87.9617	-87.9344
7094.42	-88.1913	-87.9977	-88.0823	-87.898
7095.83	-88.1775	-87.9652	-88.0871	-87.8837
7097.25	-88.1452	-87.9092	-88.0375	-87.9016
7098.68	-88.0932	-87.9048	-87.9866	-87.9
7100.08	-88.0724	-87.9144	-87.9482	-87.917
7101.64	-88.1339	-87.9251	-87.9468	-87.9344
7103.09	-88.1775	-87.9986	-87.955	-87.9476
7104.51	-88.1827	-88.0042	-88.0606	-87.9333
7105.93	-88.1076	-88.0132	-88.0914	-87.9388
7107.45	-88.1005	-87.9991	-88.0229	-88.0172
7108.89	-88.1122	-87.9827	-87.9225	-87.9556
7110.4	-88.1026	-87.8829	-87.912	-87.8744
7111.83	-88.1132	-87.8741	-87.9266	-87.8779
7113.25	-88.1261	-87.912	-87.9681	-87.8324
7114.66	-88.1364	-87.9304	-87.9817	-87.8553
7116.08	-88.2128	-87.9393	-87.9849	-87.8665
7117.5	-88.2404	-87.9219	-87.9604	-87.8489
7118.9	-88.2027	-87.924	-87.9595	-87.8978
7120.3	-88.1812	-88.039	-87.9889	-87.8124
7121.73	-88.2616	-87.9363	-87.9699	-87.8073
7123.05	-88.1162	-87.8917	-87.8709	-87.8466
7124.6	-88.0895	-87.8946	-87.8736	-87.8641
7126.06	-88.099	-87.8868	-87.8769	-87.8717
7127.45	-88.1153	-87.9001	-87.9522	-87.8981
7128.88	-88.1291	-87.9153	-87.9297	-87.8995
7130.31	-88.1389	-87.9272	-87.9126	-87.9174
7131.73	-88.1452	-87.9352	-87.9254	-87.9118
7133.15	-88.126	-87.9186	-87.7968	-87.9942
7134.59	-88.1514	-87.9435	-87.8835	-87.9162
7136.01	-88.1585	-87.9507	-87.9053	-87.8408
7137.41	-88.1593	-87.93	-87.9296	-87.831
7138.85	-88.1582	-87.9292	-87.9243	-87.7477
7140.15	-88.157	-87.9336	-87.9371	-87.7824
7141.59	-88.1561	-87.9165	-87.9513	-87.8841
7143.02	-88.1554	-87.92	-87.938	-87.9078
7144.44	-88.2012	-87.9278	-87.9211	-87.906
7145.82	-88.1779	-87.913	-87.9076	-87.9215
7147.24	-88.1662	-87.9179	-87.8983	-87.845
7148.66	-88.2758	-87.9048	-87.9166	-87.8108
7150.06	-88.3191	-87.9123	-87.9373	-87.8189
7151.62	-88.2425	-87.923	-87.9291	-87.8586
7153.06	-88.2245	-87.9318	-87.9157	-87.8732
7154.63	-88.1793	-87.9163	-87.9287	-87.8778
7156.06	-88.1849	-87.9202	-87.9935	-87.8788
7157.58	-88.2018	-87.9715	-88.0066	-87.9018
7159.02	-88.1942	-87.8914	-88.0035	-87.8783
7160.46	-88.1361	-87.8855	-87.9728	-87.9645
7161.91	-88.2186	-87.8995	-87.9914	-88.0105
7163.35	-88.2001	-87.9151	-88.0177	-87.9655
7164.64	-88.2995	-87.9271	-87.9666	-87.9322
7166.06	-88.4036	-87.9135	-87.9331	-87.9794
7167.46	-88.3674	-88.0273	-87.9367	-87.9195
7169	-88.3282	-87.9923	-87.9244	-87.8477
7170.4	-88.298	-87.9724	-87.9112	-87.9065
7171.94	-88.3701	-87.9613	-87.9253	-87.8907
7173.39	-88.3573	-87.955	-87.9428	-87.9065
7174.81	-88.2341	-87.9516	-87.9809	-87.9031
7176.22	-88.2065	-87.9498	-87.9662	-87.8958
7177.52	-88.2096	-87.9488	-88.0633	-87.9124
7178.95	-88.2659	-87.9482	-88.067	-87.7923
7180.35	-88.2059	-87.948	-88.0464	-87.8297
7181.9	-88.1088	-87.9478	-88.0249	-87.874
7183.3	-88.119	-87.9477	-87.9843	-87.909
7184.71	-88.1304	-87.9477	-87.949	-87.9329
7186.13	-88.1624	-87.9259	-87.9239	-87.948
7187.5	-88.2146	-87.9259	-87.9319	-87.8879
7188.91	-88.1664	-87.9965	-87.9461	-87.8933
7190.33	-88.1513	-88.0888	-88.0555	-87.9368
7191.61	-88.1484	-88.0983	-88.0642	-87.9559
7193.03	-88.1722	-88.0413	-88.0456	-87.941
7194.44	-88.1506	-87.9819	-88.0005	-87.9444
7195.99	-88.1693	-87.8933	-87.96	-87.9516
7197.39	-88.1933	-87.8847	-88.0523	-87.9579
7198.8	-88.1896	-88.0069	-88.0089	-87.9393
